# Supplementary material
Source: HighWire-hosted journal article supplement (https://gh.bmj.com/content/9/2/e014100)
Supplement: inline-supplementary-material-1 [file inline-supplementary-material-1.pdf]

Supplementary Table 1: Survey respondents by SDG region and subregion

| SDG Region                       | SDG Subregion                                 | Number of survey respondents | % of total reporting countries from this region | Total number of countries and external territories | % of countries that responded to survey |
|----------------------------------|-----------------------------------------------|------------------------------|-------------------------------------------------|----------------------------------------------------|-----------------------------------------|
| Sub-Saharan Africa               |                                               | 42                           |                                                 | 50                                                 | 84.0%                                   |
| <i>total</i>                     |                                               | 42                           | 27.5%                                           | 50                                                 | 84.0%                                   |
| Northern Africa and Western Asia | Northern Africa                               | 5                            |                                                 | 7                                                  | 71.4%                                   |
|                                  | Western Asia                                  | 15                           |                                                 | 18                                                 | 83.3%                                   |
| <i>total</i>                     |                                               | 20                           | 13.1%                                           | 25                                                 | 80.0%                                   |
| Central and Southern Asia        | Central Asia                                  | 4                            |                                                 | 5                                                  | 80.0%                                   |
|                                  | Southern Asia                                 | 9                            |                                                 | 9                                                  | 100.0%                                  |
| <i>total</i>                     |                                               | 13                           | 8.5%                                            | 14                                                 | 92.9%                                   |
| Eastern and South-Eastern Asia   | Eastern Asia                                  | 4                            |                                                 | 7                                                  | 57.1%                                   |
|                                  | South-Eastern Asia                            | 9                            |                                                 | 11                                                 | 81.8%                                   |
| <i>total</i>                     |                                               | 13                           | 8.5%                                            | 18                                                 | 72.2%                                   |
| Latin America and the Caribbean  | Caribbean                                     | 8                            |                                                 | 28                                                 | 28.6%                                   |
|                                  | Central America                               | 8                            |                                                 | 8                                                  | 100.0%                                  |
|                                  | South America                                 | 12                           |                                                 | 15                                                 | 80.0%                                   |
| <i>total</i>                     |                                               | 28                           | 18.3%                                           | 51                                                 | 54.9%                                   |
| Oceania                          | Australia and New Zealand                     | 2                            |                                                 | 6                                                  | 33.3%                                   |
|                                  | Oceania (excluding Australia and New Zealand) | 1                            |                                                 | 23                                                 | 4.3%                                    |
| <i>total</i>                     |                                               | 3                            | 2.0%                                            | 29                                                 | 10.3%                                   |
| Europe and Northern America      | Europe                                        | 33                           |                                                 | 52                                                 | 63.5%                                   |
|                                  | Northern America                              | 1                            |                                                 | 4                                                  | 25.0%                                   |
| <i>total</i>                     |                                               | 34                           | 22.2%                                           | 56                                                 | 60.7%                                   |
| <b>Totals</b>                    |                                               | <b>153</b>                   |                                                 | <b>243</b>                                         | <b>63.0%</b>                            |
