# Supplementary material
Source: HighWire-hosted journal article supplement (https://gh.bmj.com/content/9/2/e014100)
Supplement: inline-supplementary-material-2 [file inline-supplementary-material-2.pdf]

# Supportive laws by country

For each country, how many supportive laws are reported to not exist?

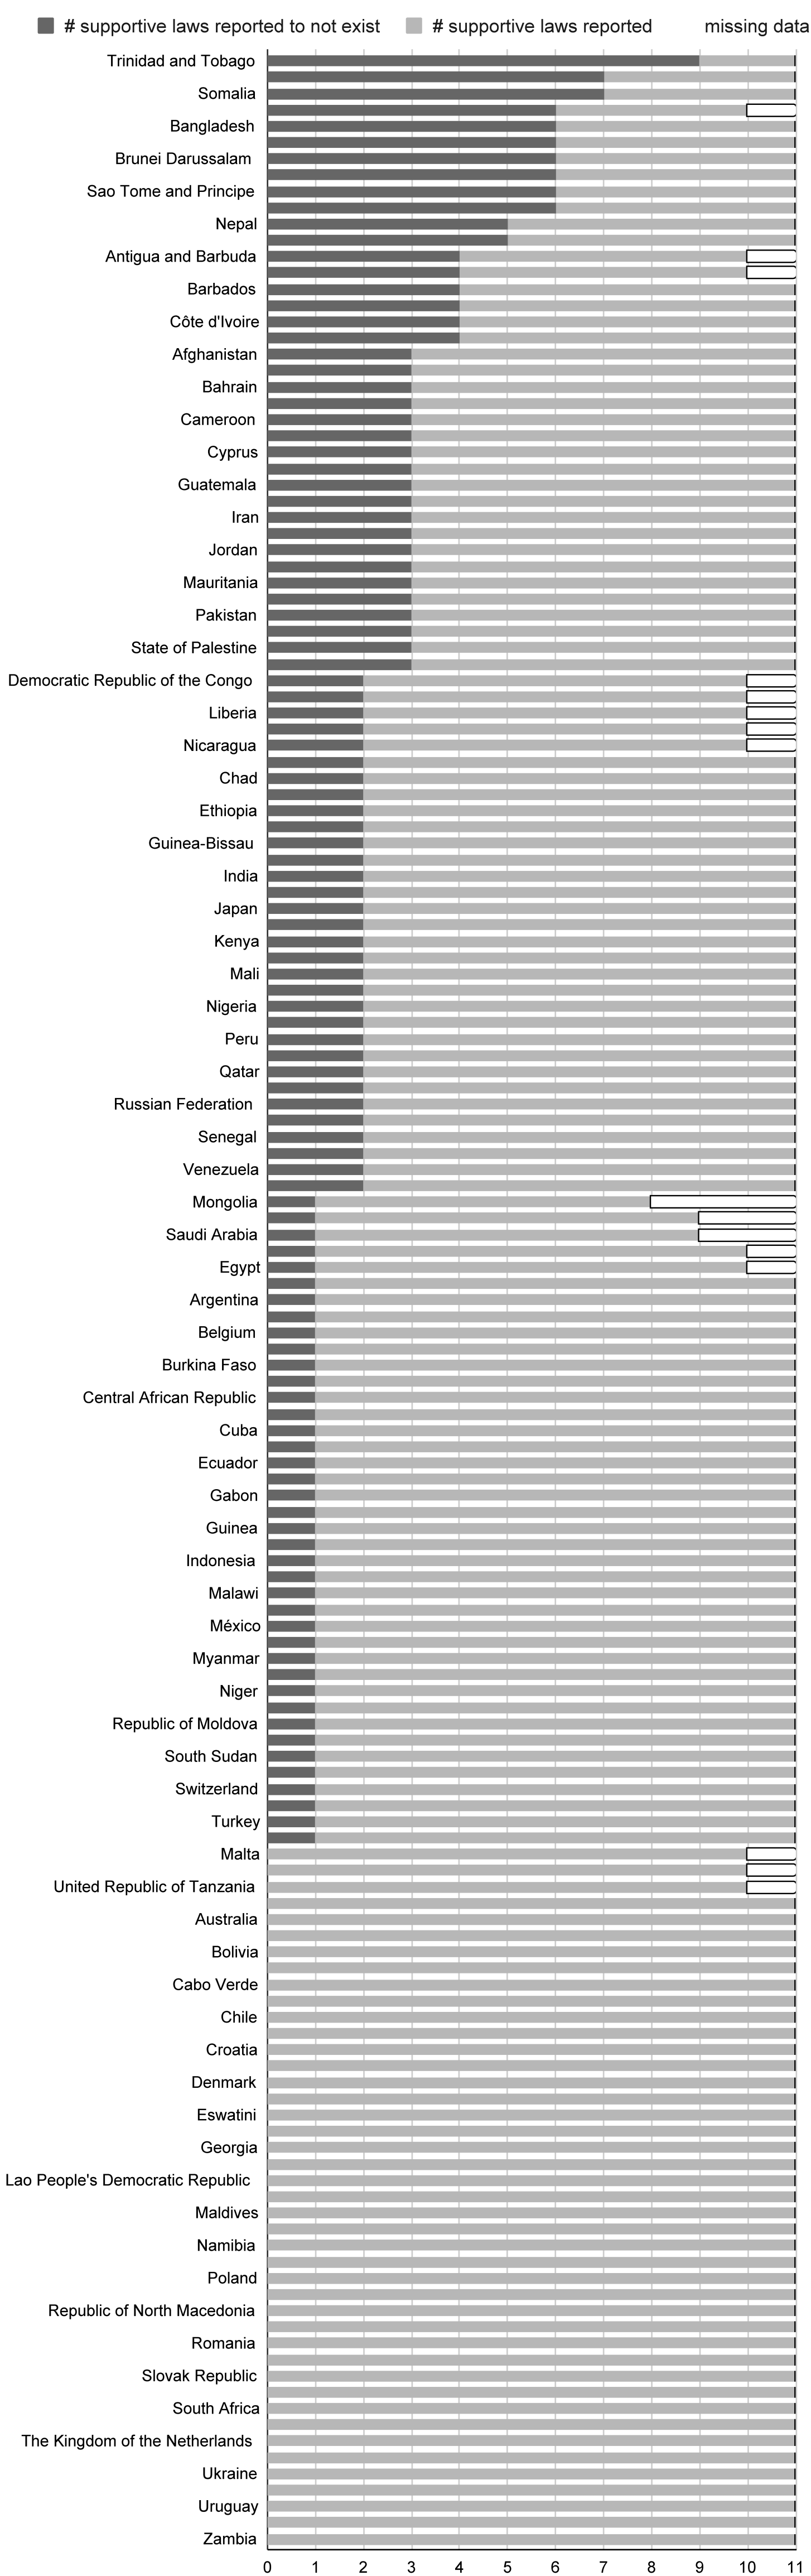

Data on supportive laws
