# Supplementary material
Source: HighWire-hosted journal article supplement (https://gh.bmj.com/content/9/2/e014100)
Supplement: inline-supplementary-material-3 [file inline-supplementary-material-3.pdf]

*Supplementary Table 2: Overview of restrictions (by type) in countries with all possible supportive laws*

| <b>Restriction type</b>                                                                                                        | <b>Third-party authorization requirement</b> | <b>Age</b> | <b>Marital status</b> | <b>Sex</b> |
|--------------------------------------------------------------------------------------------------------------------------------|----------------------------------------------|------------|-----------------------|------------|
| Number of countries that responded to all questions ( <i>meaning they had all possible relevant supportive laws in place</i> ) | 66                                           | 111        | 110                   | 136        |
| Number of countries that reported at least one of this type of restriction                                                     | 44                                           | 47         | 12                    | 2          |
| Percentage of countries that reported at least one of this type of restriction                                                 | 66%                                          | 42%        | 11%                   | 1.5%       |
